# Supplementary material
Source: publisher figshare collection journal article supplement (https://acs.figshare.com/ndownloader/files/3840385)
Supplement: Supplementary file 1 [file 3840385]

# SUPPORTING INFORMATION

## Controllable Synthesis of Stereoregular Polyesters by Organocatalytic Alternating Copolymerizations of Cyclohexene oxide and Norbornene Anhydrides

Bing Han,<sup>†</sup> Li Zhang,<sup>†</sup> Binyuan Liu,<sup>\*,†</sup> Xiaofang Dong,<sup>†</sup> Il Kim,<sup>\*,‡</sup> Zhongyu Duan,<sup>†</sup> and Patrick Theato<sup>§</sup>

<sup>†</sup>*Department of Polymer Science and Engineering, Hebei University of Technology, No 8  
Guangrong Road, Hongqiao District, Tianjin, 300130, China*

<sup>‡</sup>*The WCU Center for Synthetic Polymer Bioconjugate Hybrid Materials, Department of  
Polymer Science and Engineering, Pusan National University, Busan 609-735, Korea*

<sup>§</sup>*Institute for Technical and Macromolecular, University of Hamburg, Bundesstrasse 45, D-  
20146 Hamburg, Germany*

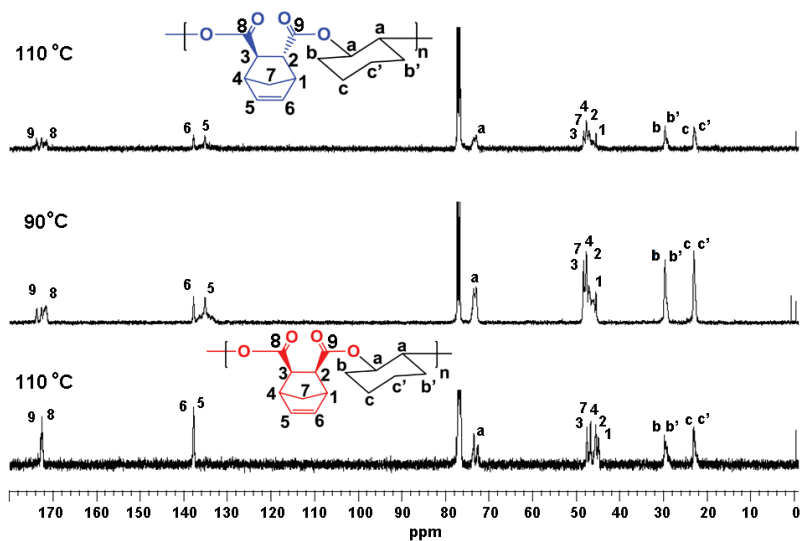

**Figure S1.** Representative  $^{13}\text{C}$  NMR spectra of the obtained polyester (A) *endo*-NA/CHO=1:1(molar ratio) at 110°C (entry7, Table1); (B) *endo*-NA/CHO=1:1(molar ratio) at 90 °C (entry 11, Table 1); and (C) *exo*-NA/CHO=1:1(molar ratio) 110 °C (entry 1, Table 1)

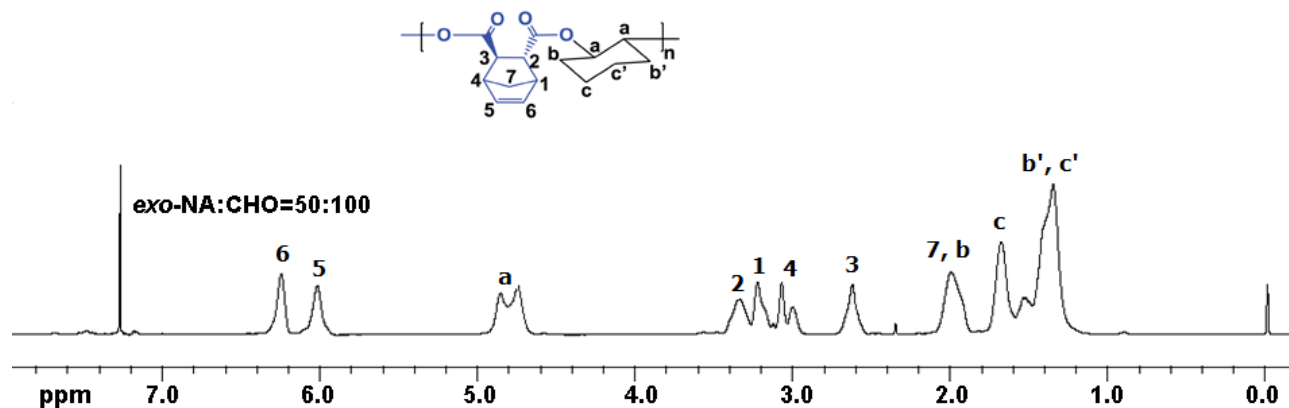

**Figure S2.**  $^1\text{H}$  NMR spectra of the obtained polyester (entry 4, Table 1) in  $\text{CDCl}_3$

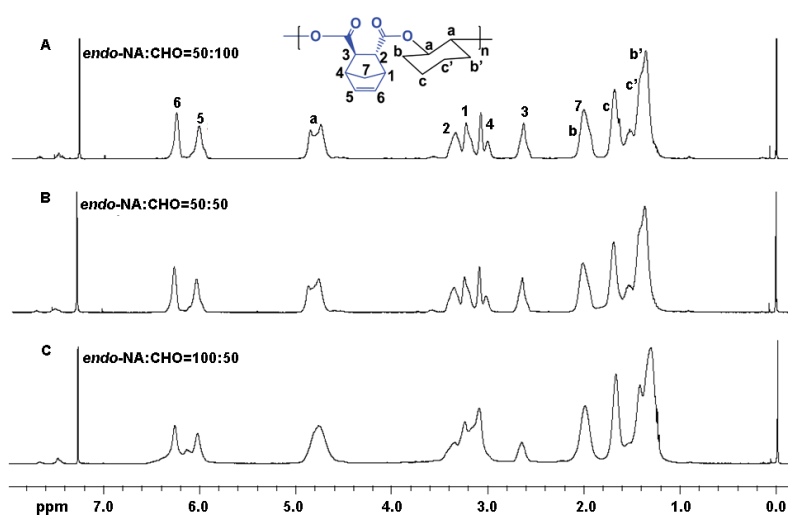

**Figure S3.**  $^1\text{H}$  NMR spectra of the obtained polyesters (A) sample of entry 8 in Table 1); (B) sample of entry 7 in Table 1; and (C) sample of entry 10 in Table 1) in  $\text{CDCl}_3$

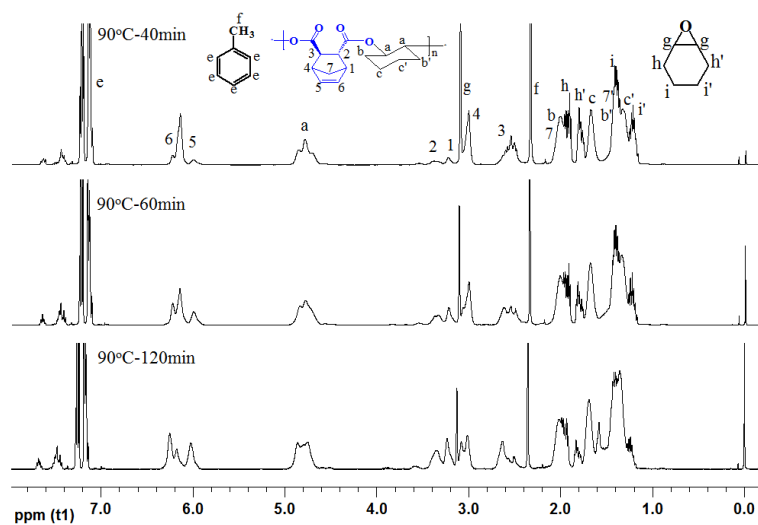

A

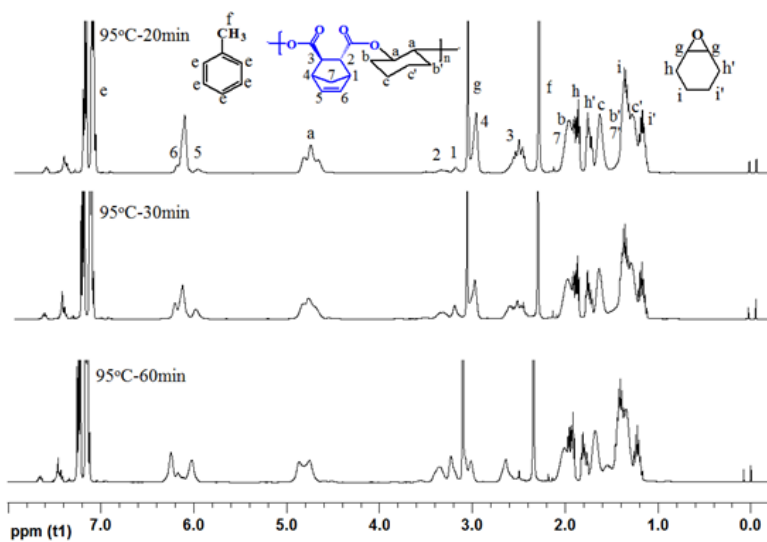

B

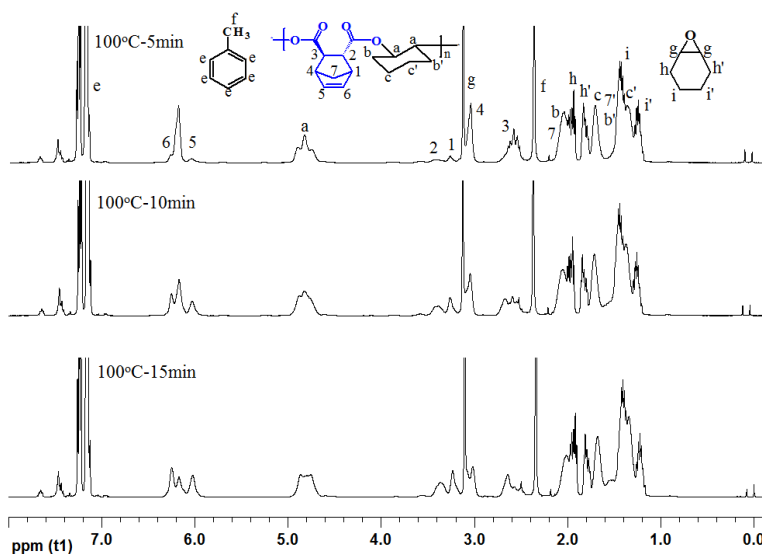

C

**Figure S4.**  $^1\text{H}$  NMR spectra of the mixture at different time. A) 90 °C; B) 95 °C; C) 100 °C

Reaction conditions: Solvent: toluene. First step: 110°C, 3h, CHO/*exo*-NA/PPNCl=50:50:1

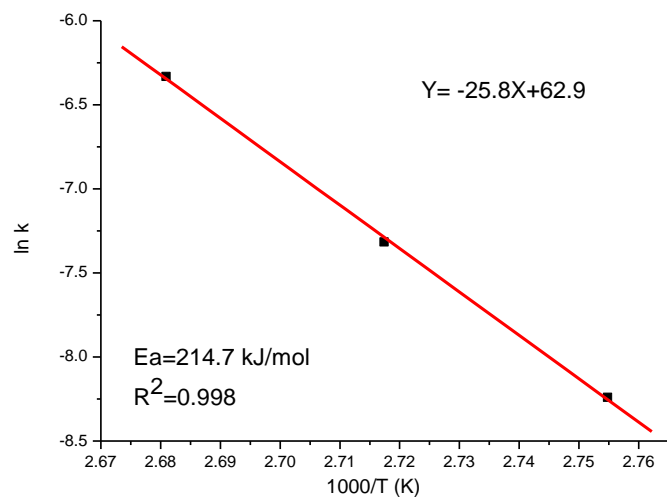

**Figure S5.** Arrhenius plots for the formation of trans-polyester. The equations for the linear fit are given in the top right corners, while the activation energies are given in the bottom left corners as insets.

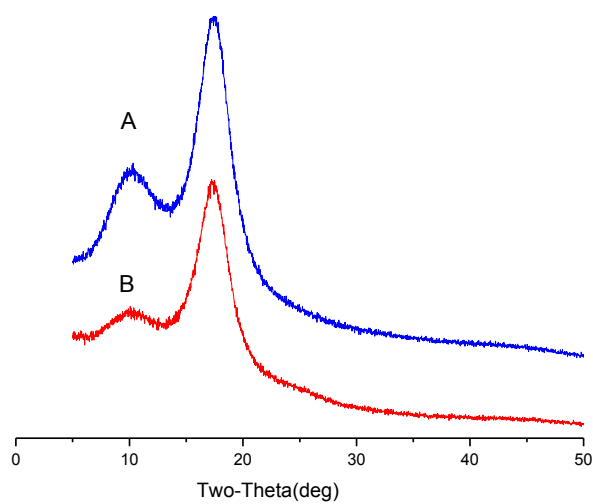

**Figure S6.** WAXD patterns of (A) *Cis*-polyester ( $M_n = 6.89 \times 10^3$ , PDI=1.57) and (B) *Trans*-polyester ( $M_n = 6.20 \times 10^3$ , PDI=2.31)

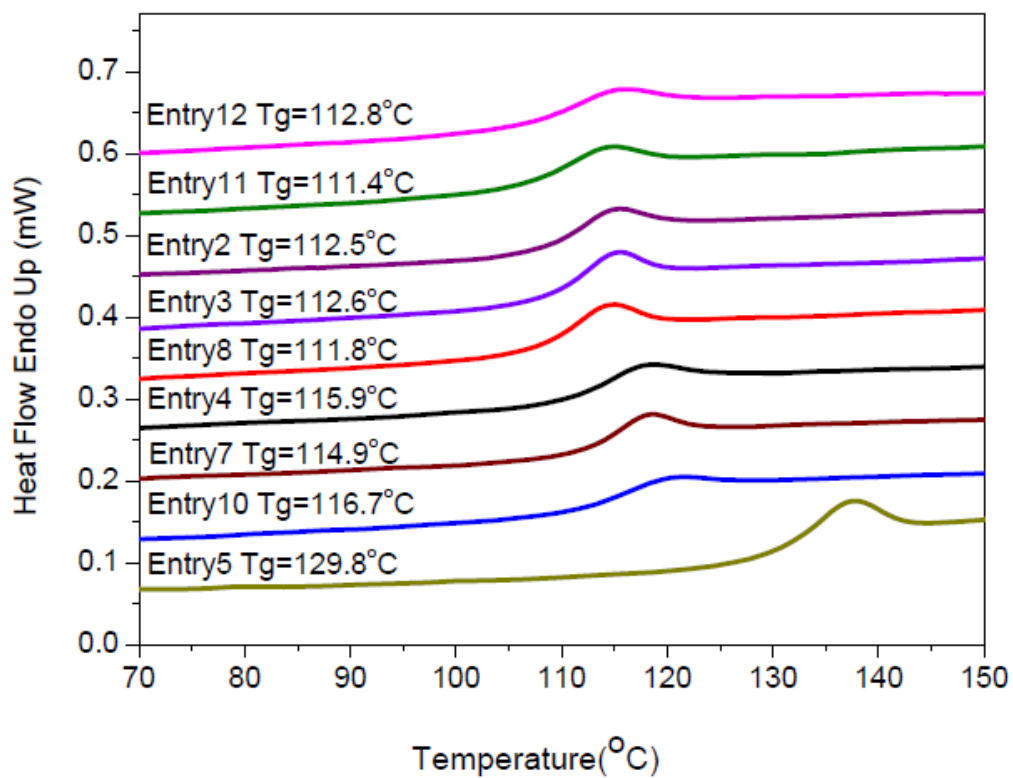

(A)

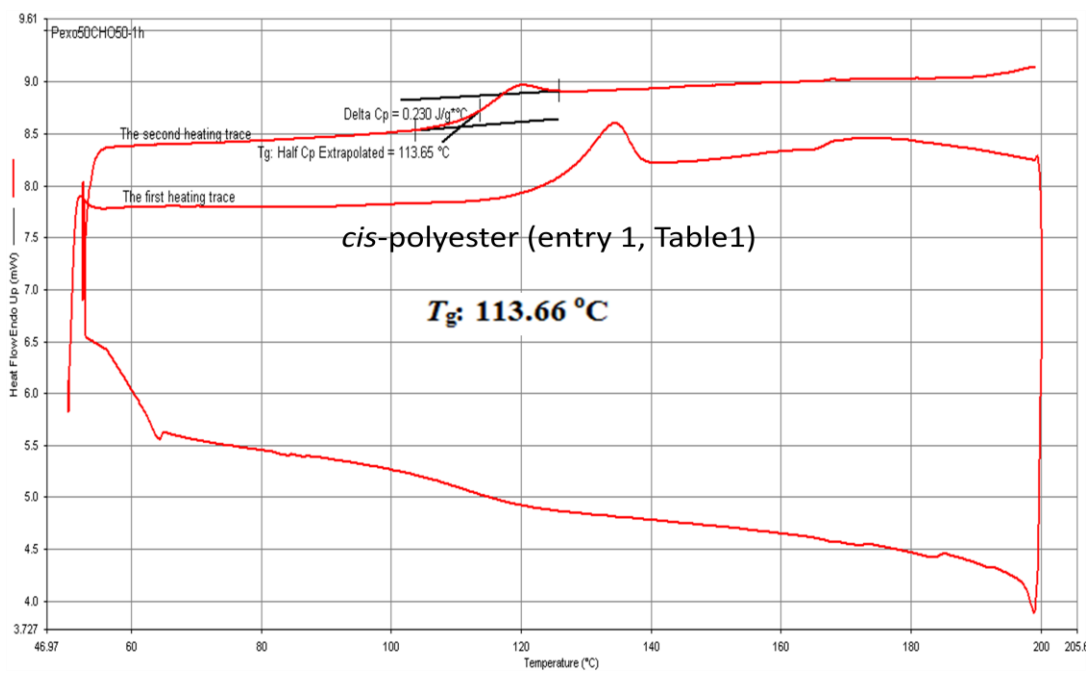

(B)

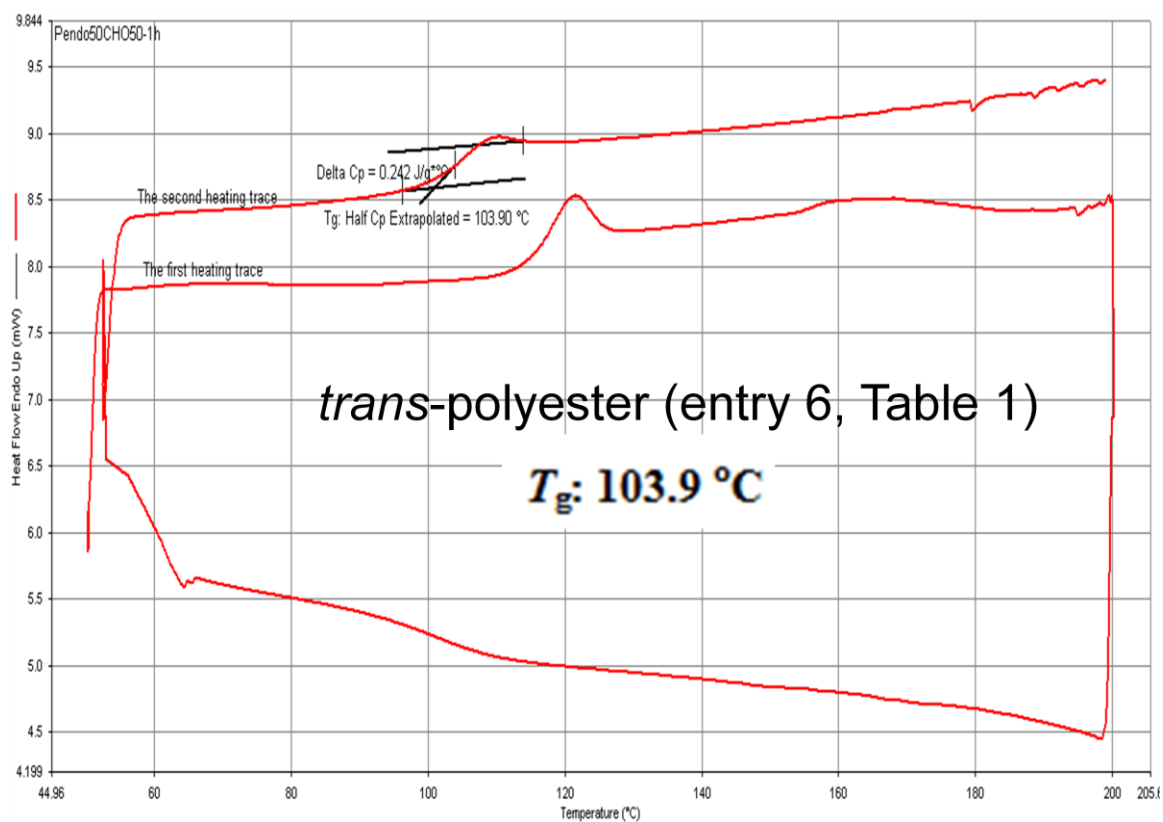

(C)

**Figure S7.** DSC curves of some polyesters (Table 1)

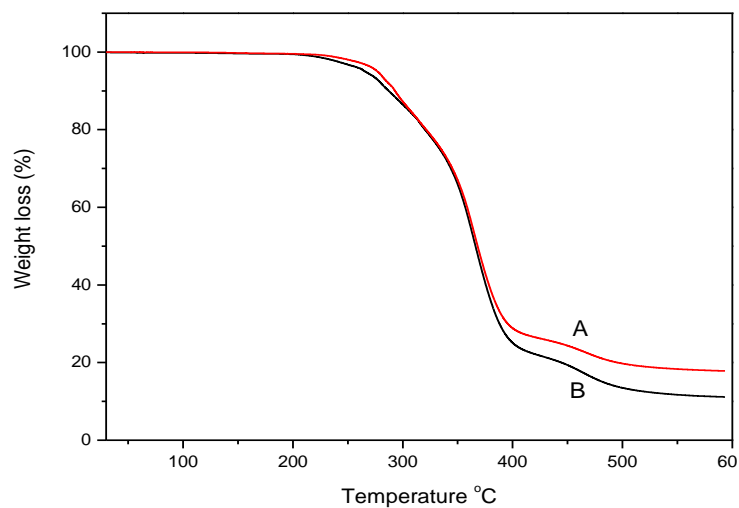

**Figure S8.** TGA curves of (A) *Cis*-polyester ( $M_n=6.89 \times 10^3$ , PDI=1.57) and (B) *Trans*-polyester ( $M_n=6.20 \times 10^3$ , PDI=2.31)

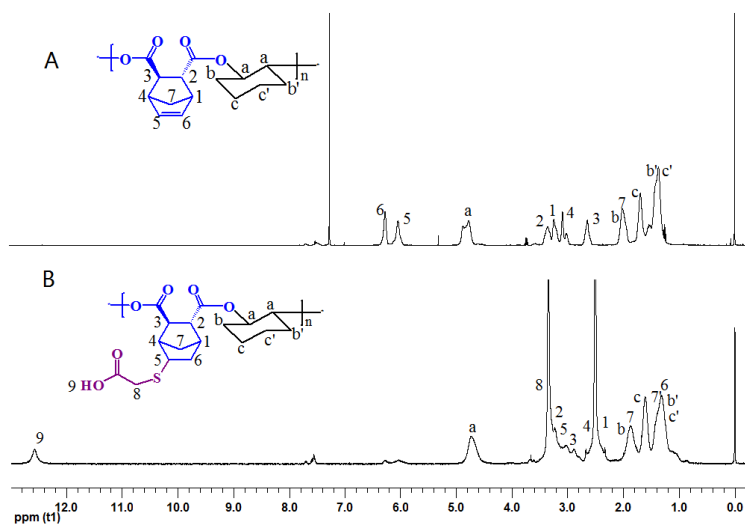

**Figure S9.**  $^1\text{H}$  NMR spectra of *Trans*-polyester before (A) and after (B) modification with *thiol-ene* reaction ( $M_n=6.20 \times 10^3$ , PDI=2.31)



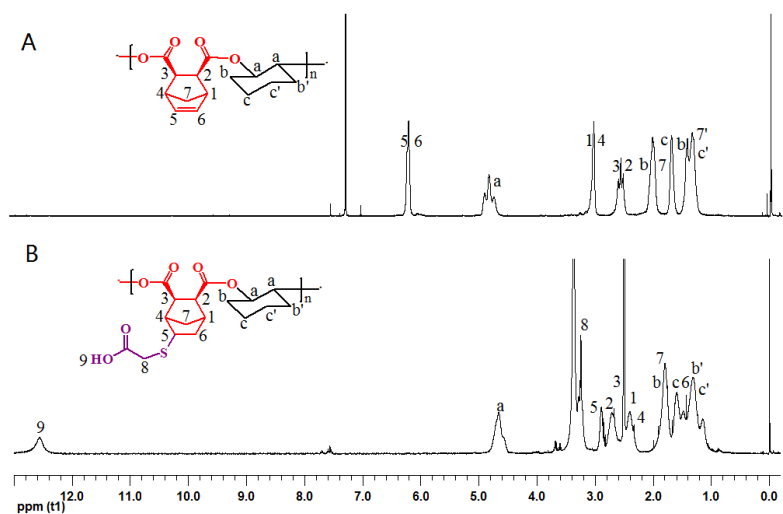

**Figure S10.**  $^1\text{H}$  NMR spectra of *Cis*-polyester before (A) and after (B) modified by *thiol-ene* reaction with mercaptoacetic acid at 70 °C in THF with AIBN as initiator ( $M_n=6.89 \times 10^3$ , PDI=1.57 for A).

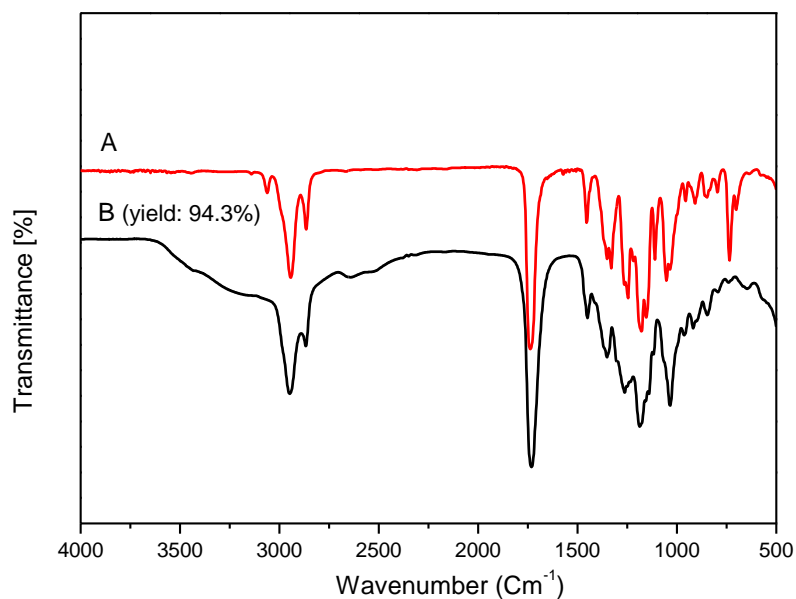

**Figure S11.** IR spectra of *Cis*-polyester before (A) and after (B) *thiol-ene* reaction at 70 °C in THF with AIBN as initiator ( $M_n=6.89 \times 10^3$ , PDI=1.57 for A )

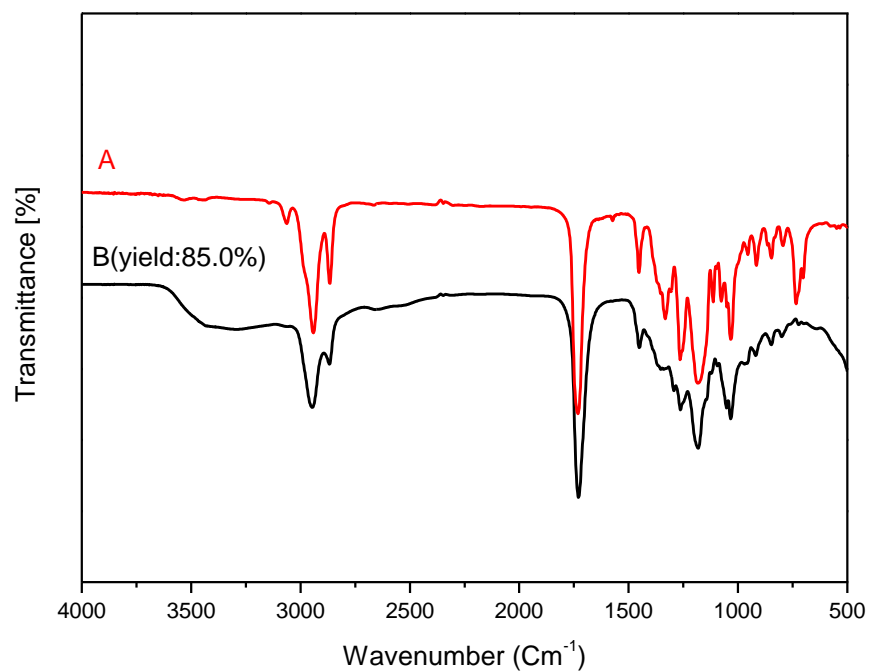

**Figure S12.** IR spectra of *Trans*-polyester before (A) and after (B) *thiol-ene* reaction at 70 °C in THF with AIBN as initiator ( $M_n=6.20 \times 10^3$ , PDI=2.31 for A)

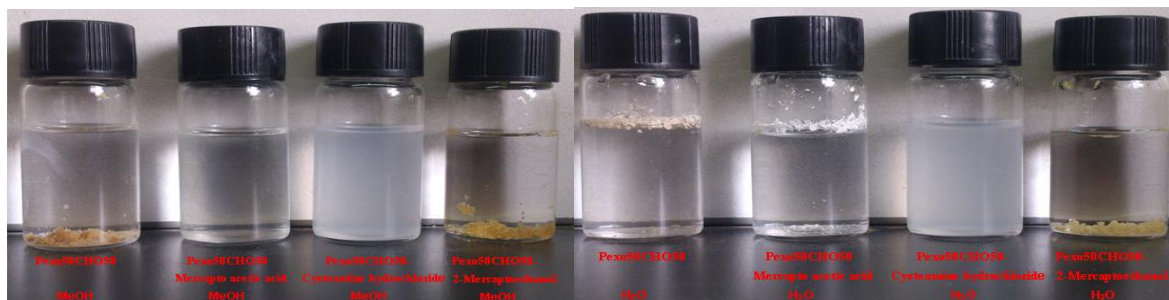

**Figure S13.** Solubility of polyesters in methanol or water before and after modification

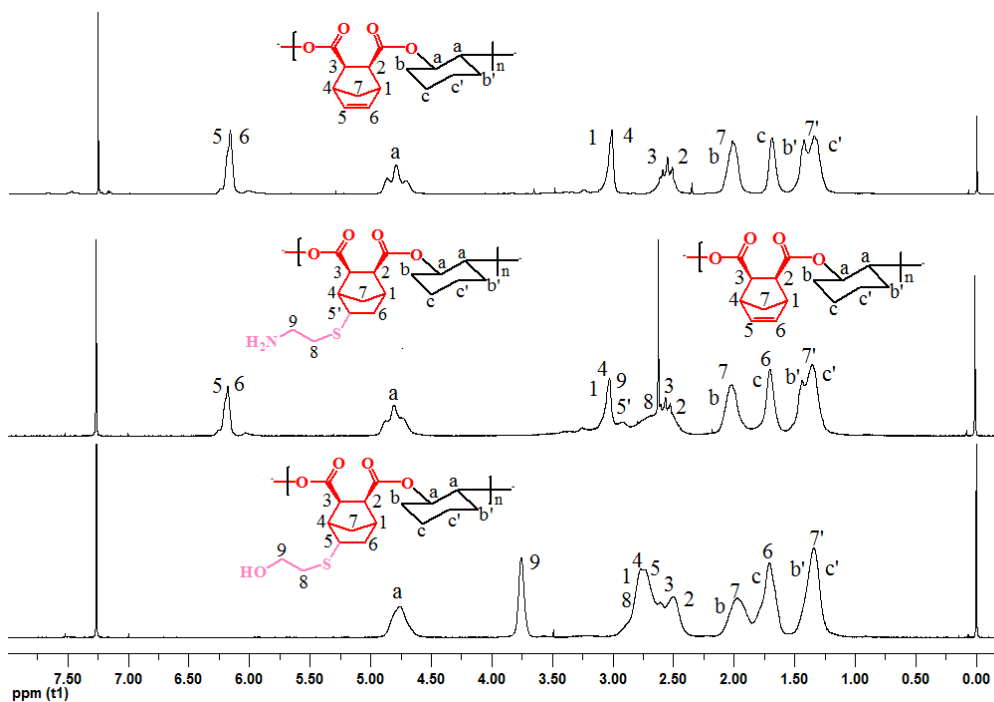

**Figure S14.**  $^1\text{H}$  NMR spectra of *Cis*-polyester before and after modified by *thiol-ene* reaction with 2-mercaptoethanol and cysteamine at 70 °C in THF with AIBN as initiator, respectively ( $M_n=6.89 \times 10^3$ , PDI=1.57 for *Cis*-polyester before modifications).

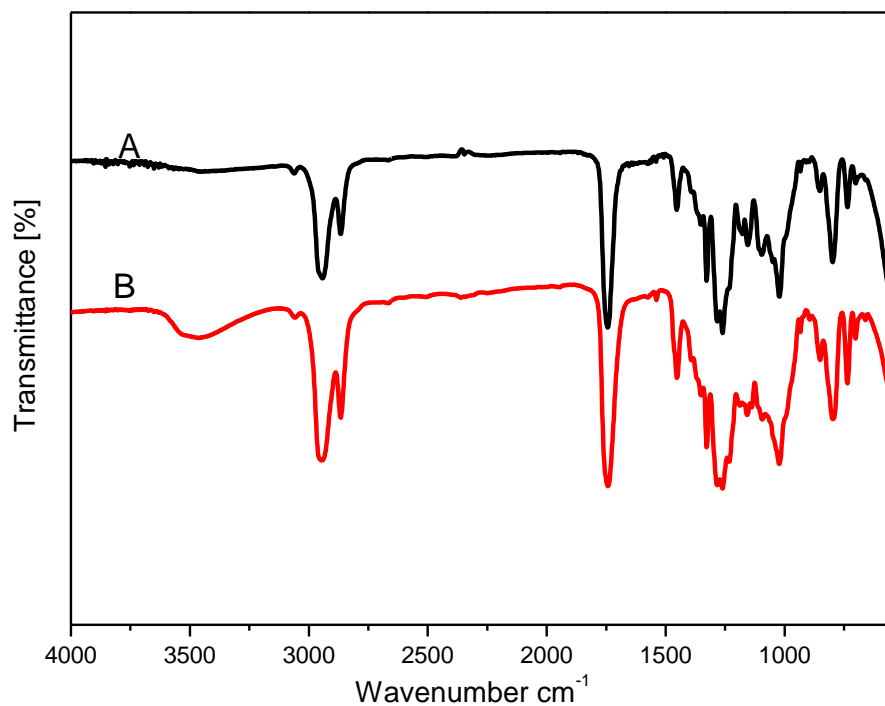

**Figure S15.** IR spectra of *Cis*-polyester before (A) and after (B) *thiol-ene* reaction with 2-mercaptoethanol at 70 °C in THF with AIBN as initiator ( $M_n=6.89 \times 10^3$ , PDI=1.57 for A,  $M_n=8.10 \times 10^3$ , PDI=1.26 for B).

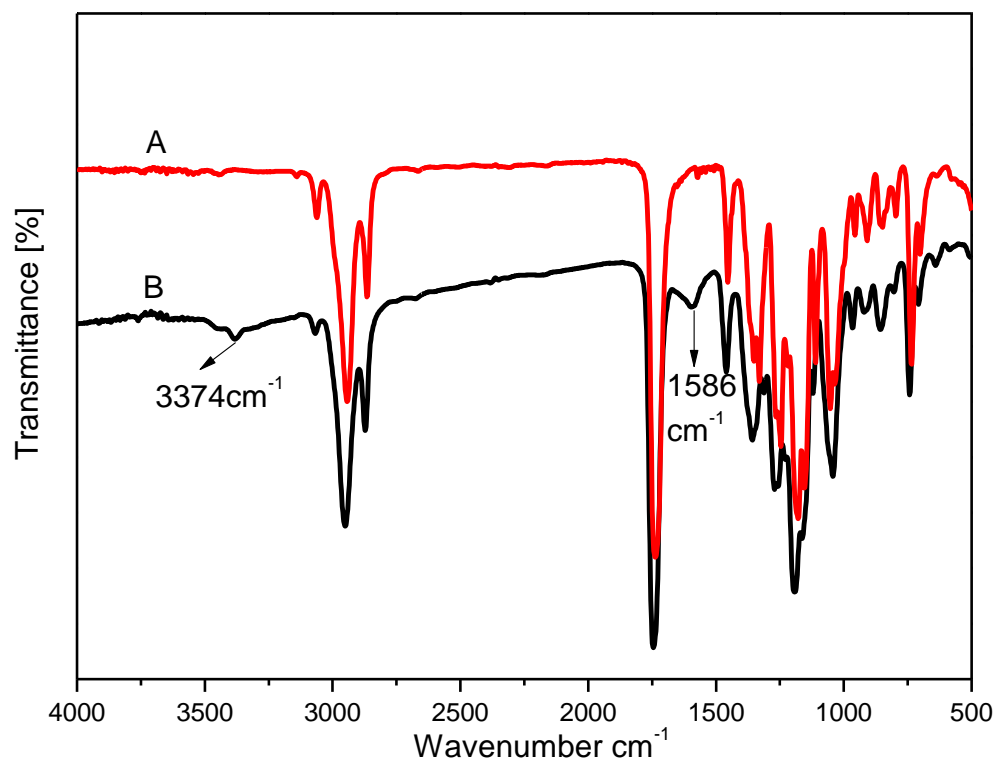

**Figure S16.** IR spectra of *Cis*-polyester before (A) and after (B) *thiol-ene* reaction with cysteamine at 70 °C in THF with AIBN as initiator ( $M_n=6.89 \times 10^3$ , PDI=1.57 for A,  $M_n=7.06 \times 10^3$ , PDI=1.26 for B).
